# Supplementary material for: Sulfur encapsulated in a wafer-like carbon substrate with interconnected meso/micropores for high-performance lithium–sulfur batteries
Source: Royal Society of Chemistry journal article supplement (doi:10.1039/c9qi00970a), 2019-01-01
Supplement: c9qi00970a1.pdf [file c9qi00970a1.pdf]

## Supporting information

# Sulfur Encapsulated in Wafer-like Carbon Substrate with Interconnected meso/micro Pores for High-Performance Lithium-sulfur Batteries

Ya-Bo Zhang<sup>a</sup>, Yang Zhao<sup>b</sup>, Xiao-Feng Hao<sup>a</sup>, Yuan-chuan Ma<sup>a</sup>, Yang Wu<sup>c</sup>, Guang-lan Li<sup>a</sup>, Jing-jing Cao<sup>a</sup>, Yang Yan<sup>\*a</sup>, Li-zhen Qiao<sup>\*a</sup> and Ce Hao<sup>a</sup>

<sup>a</sup> State Key Laboratory of Fine Chemicals, School of Chemical Engineering, Dalian University of Technology, Panjin 124221, Liaoning, P.R. China

<sup>b</sup> School of Art, Qilu Institute of Technology, Qufu, 273100, Shandong, P.R. China

<sup>c</sup> No.2 Middle School of Dezhou in Shan Dong Province, Dezhou, 253013, Shandong, P.R. China.

**E-mail:** yanyang@dlut.edu.cn;

**Keywords:** micro/mesoporous carbon, ionic liquid, graphene, lithium-sulfur batteries

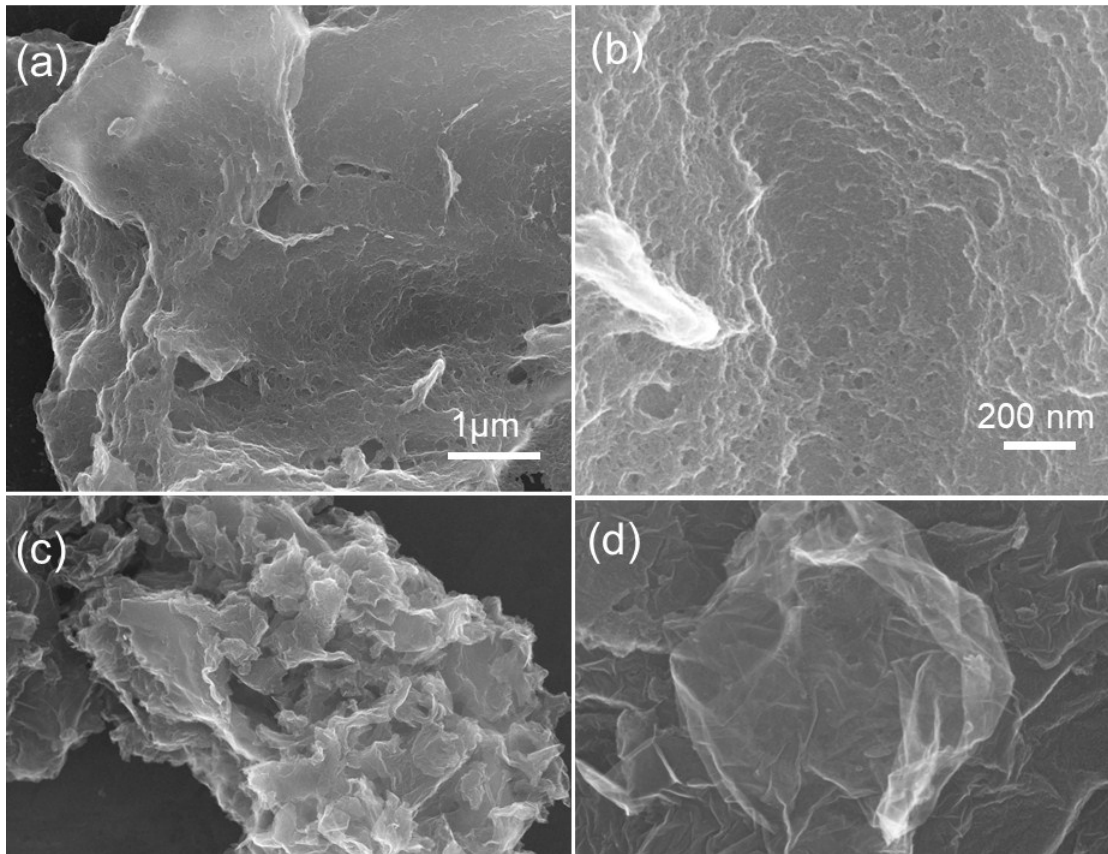

Figure S1(a,b) SEM images of GG; (c,d) SEM images of GI

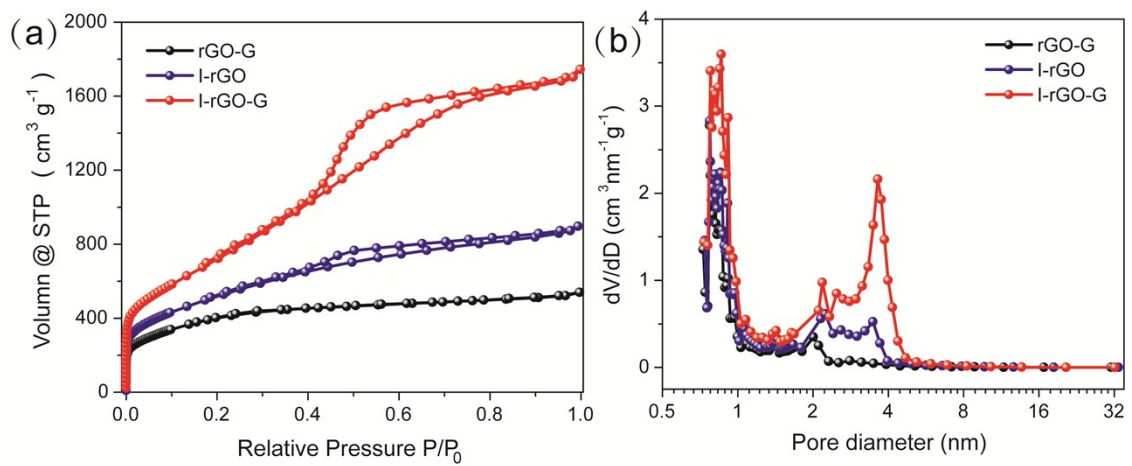

Figure S2. (a) Nitrogen adsorption/desorption isotherms of I-rGO-G, I-rGO and rGO-G. (b) The pore size distributions of I-rGO-G, I-rGO and rGO-G.

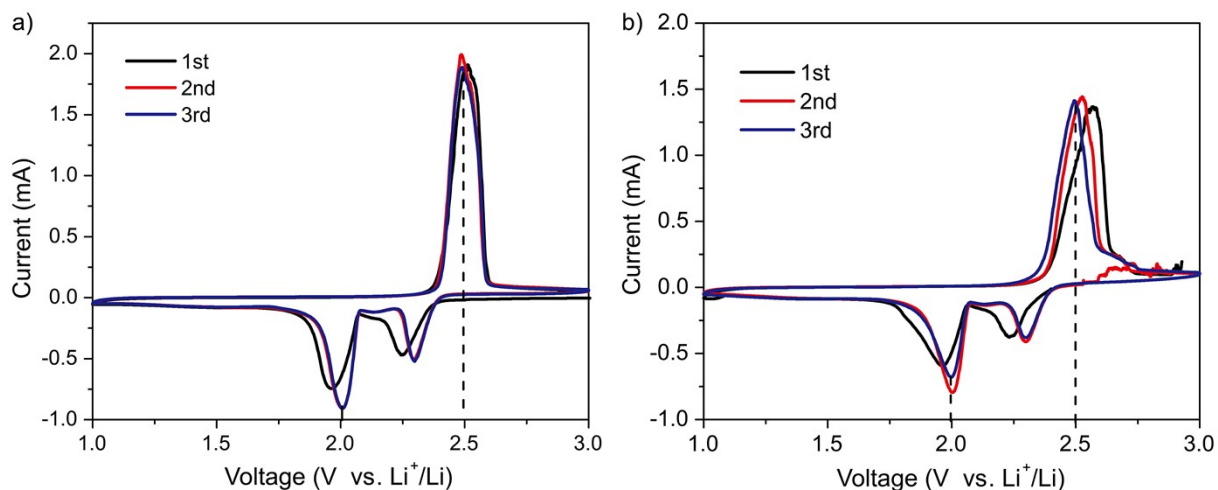

**Figure S3.** CV curves of (a) S/I-rGO and (b) S/rGO-G cathodes at a scan rate of 0.1  $\text{mV s}^{-1}$ .

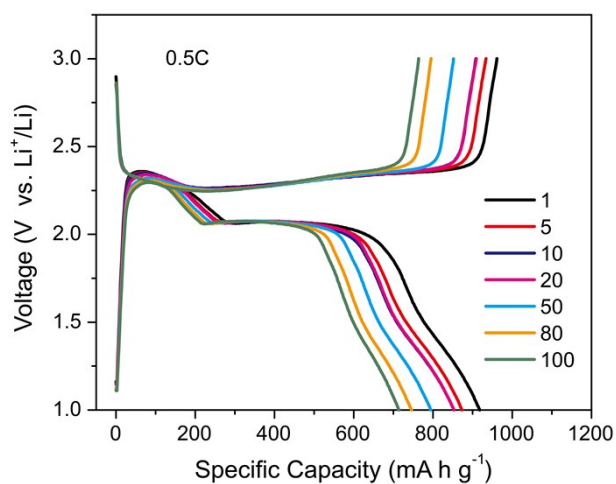

**Figure S4.** GCD voltage profiles of the S/I-rGO-G cathode for 100 cycles at a current rate of 0.5 C

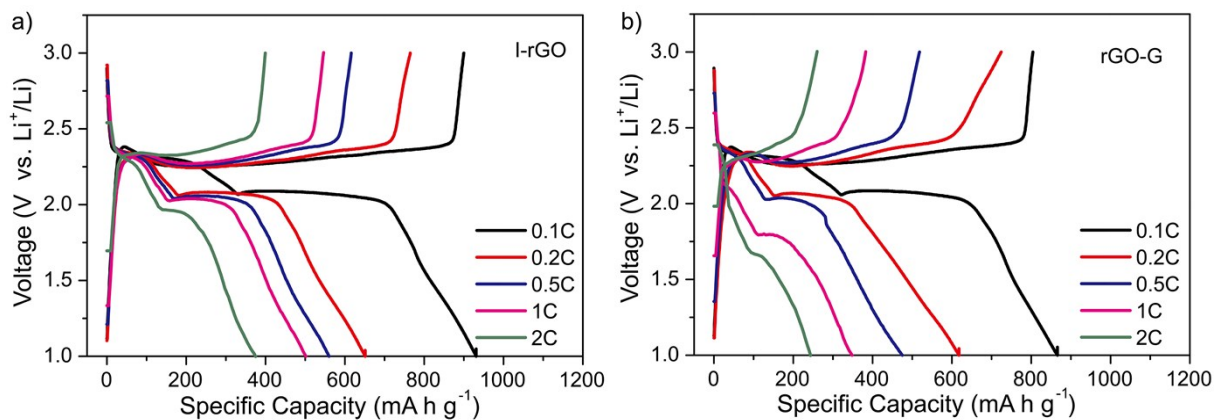

**Figure S5.** GCD voltage profiles of (a) S/I-rGO and (b) S/rGO-G cathodes at different discharge/charge current rates (0.1, 0.2, 0.5, 1, 2 C).

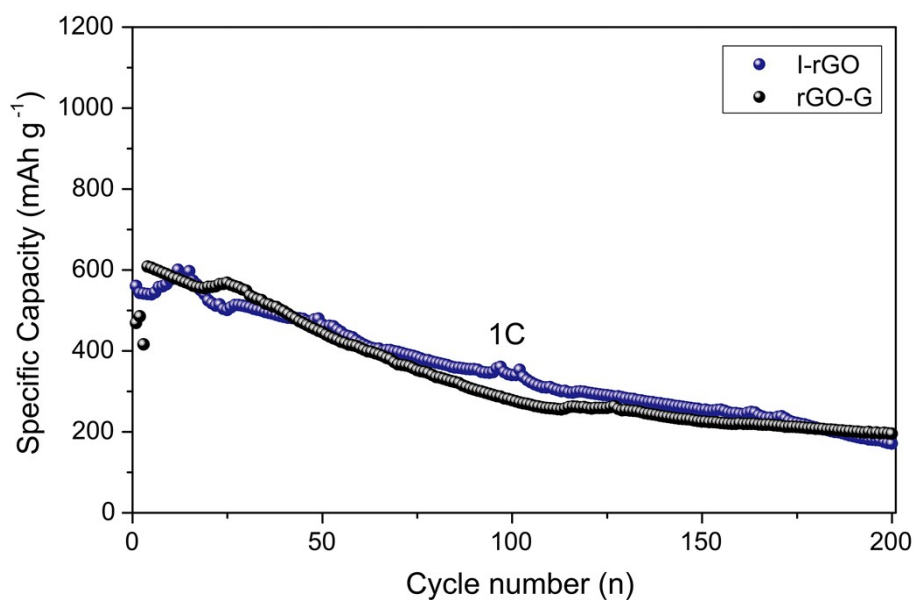

**Figure S6.** Cycling performance of (a) S/I-rGO and (b) S/rGO-G cathodes for 200 cycles at a current rate of 1 C.

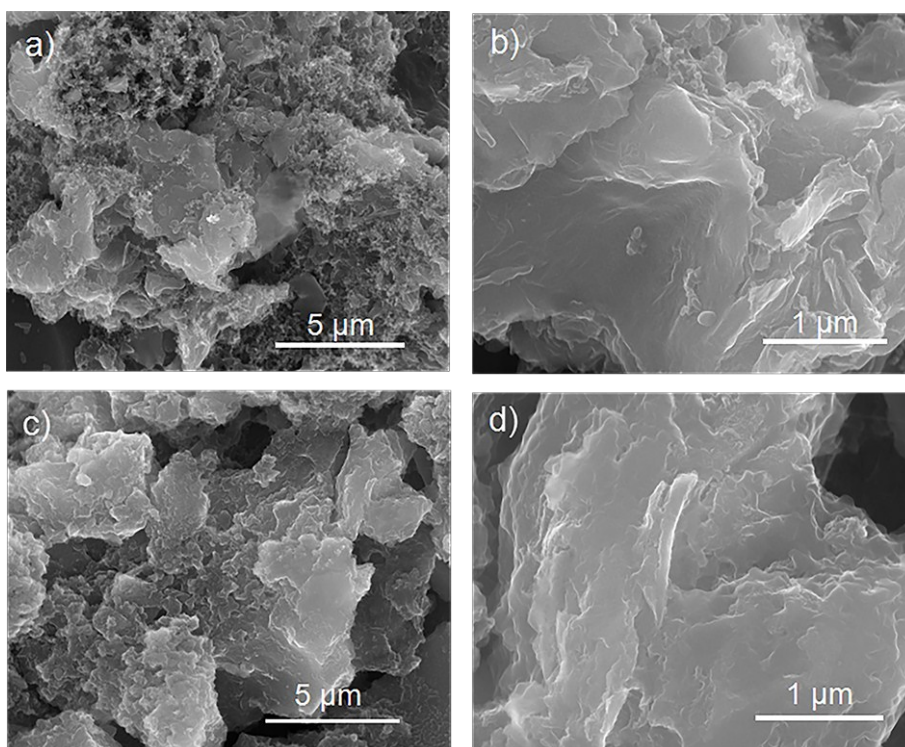

**Figure S7.** SEM images of the S/I-rGO-G cathode before (a, b) and after (c, d) cycling for 200 cycles at 1 C rate.

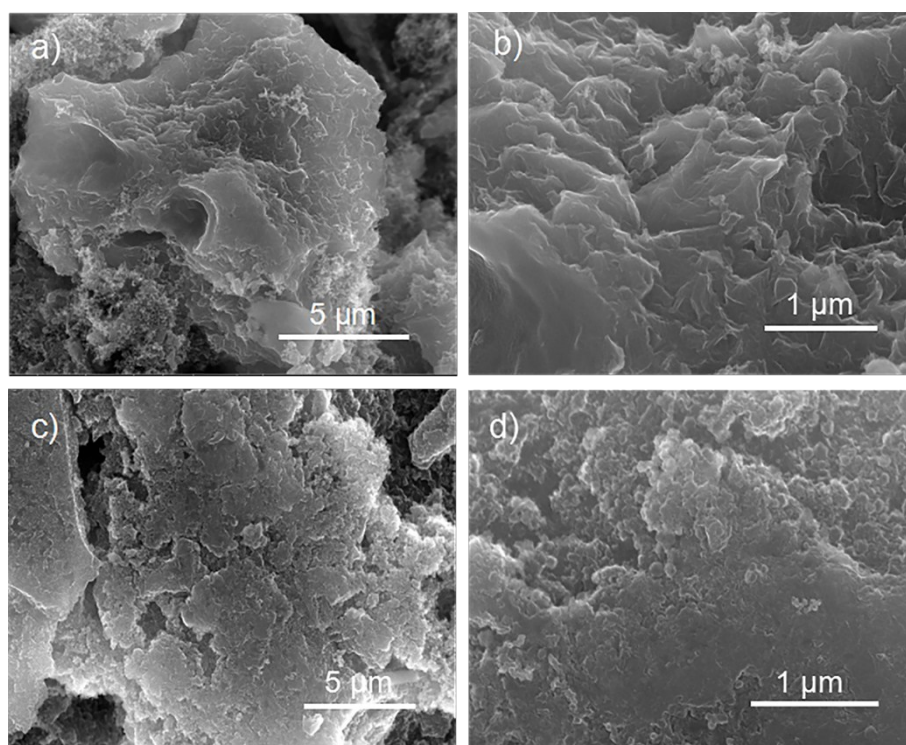

**Figure S8.** SEM images of the S/I-rGO cathode before (a, b) and after cycling for



200 cycles (c, d) at a 1 C rate.

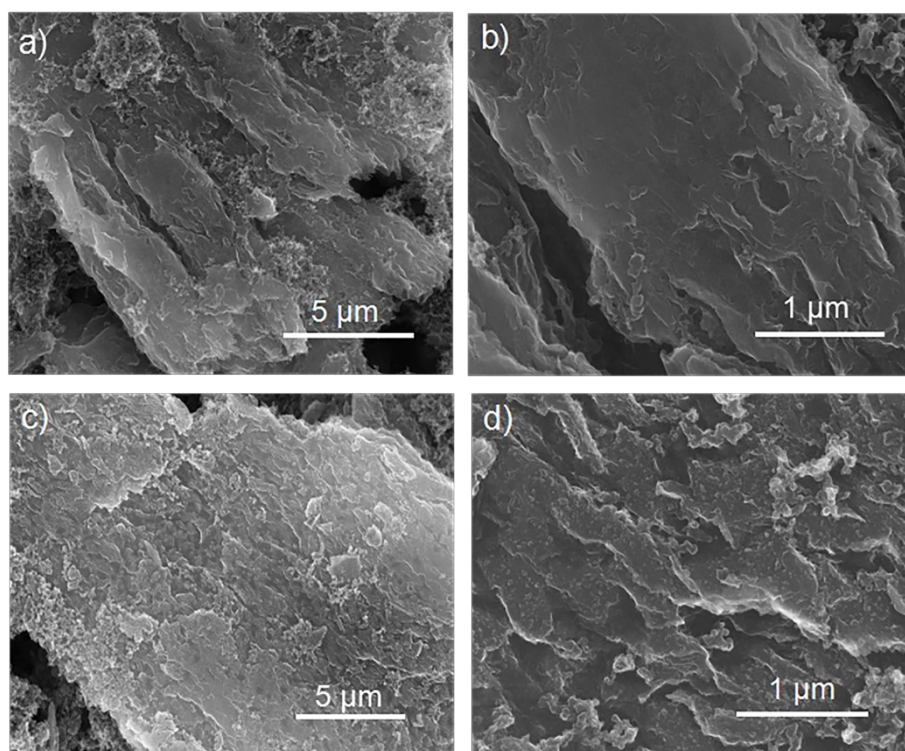

**Figure S9.** SEM images of the S/rGO-G cathode before (a, b) and after cycling for 200 cycles (c, d) at a 1 C rate.

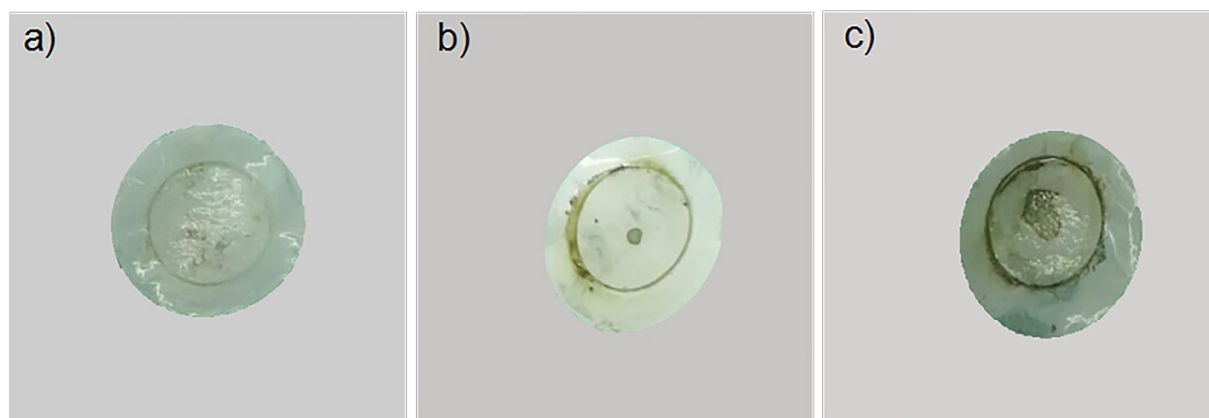

**Figure S10.** Digital photograph of separators in the detached Li-S cells: (a) with S/I-rGO-G cathode; (b) with S/I-rGO cathode; (c) with S/rGO-G cathode.

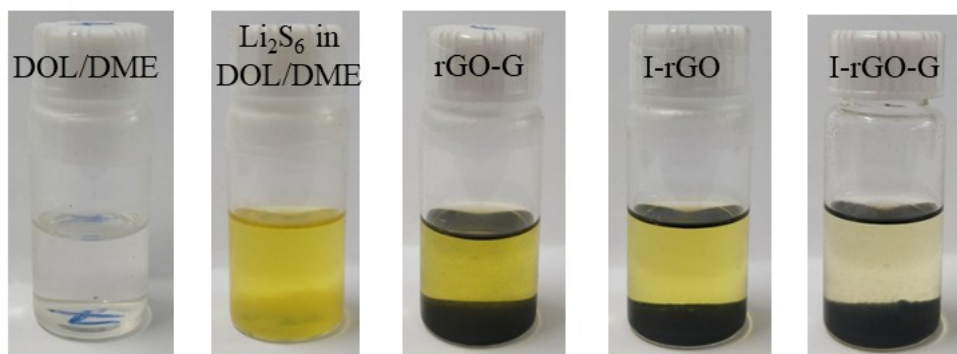

Figure S11. The adsorption test for I-rGO-G, I-rGO and rGO-G in Li<sub>2</sub>S<sub>6</sub>-DOL/DME solution
